# Supplementary material
Source: Springer Nature journal article supplement (https://www.springermedizin.de/resource/supplementary/12877_2012_827_MOESM3_ESM.pdf/9440482)
Supplement: MOESM3 [file 9440482]

# Basic Mobility

| Basic Mobility                       |                                                                                     | Stage      | Status                                                                                   | Illustration/<br>ICF code                                                             |
|--------------------------------------|-------------------------------------------------------------------------------------|------------|------------------------------------------------------------------------------------------|---------------------------------------------------------------------------------------|
|                                      |                                                                                     | <b>5</b>   | Maintain standing position                                                               | 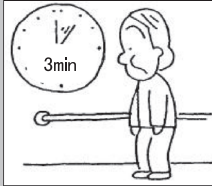    |
| <b>Maintaining standing position</b> | Maintain standing position without help for 3 minutes                               | <b>Yes</b> | ↑                                                                                        |                                                                                       |
|                                      |                                                                                     | <b>No</b>  | ↓                                                                                        | d4154b                                                                                |
|                                      |                                                                                     | <b>4</b>   | Does not maintain standing position but transfer from sitting position to lying position |    |
| <b>Transfer while sitting</b>        | As transferring from sitting to bed, transferring oneself from and to sitting level | <b>Yes</b> | ↑                                                                                        |                                                                                       |
|                                      |                                                                                     | <b>No</b>  | ↓                                                                                        | d4200                                                                                 |
|                                      |                                                                                     | <b>3</b>   | Does not transfer while sitting, but maintain sitting without assistance                 |    |
| <b>Maintain sitting position</b>     | Maintain sitting position without assistance                                        | <b>Yes</b> | ↑                                                                                        |                                                                                       |
|                                      |                                                                                     | <b>No</b>  | ↓                                                                                        | d4153a                                                                                |
|                                      |                                                                                     | <b>2</b>   | Does not maintain sitting position, but change lying position                            |   |
| <b>Change lying position</b>         | Change lying position (with/without holding assistive devices)                      | <b>Yes</b> | ↑                                                                                        |                                                                                       |
|                                      |                                                                                     | <b>No</b>  | ↓                                                                                        | d4208a                                                                                |
|                                      |                                                                                     | <b>1</b>   | Does not change lying position                                                           |  |
